# Supplementary material
Source: HighWire-hosted journal article supplement (http://www.qdcxjkg.com/highwire/filestream/131547/field_highwire_adjunct_files/4/ERJ-00699-2016_Appendix_5.pdf)
Supplement: ERJ-00699-2016_Appendix_5.pdf [file ERJ-00699-2016_Appendix_5.pdf]

Appendix 5 Risk of bias assessments for the studies

| First author, Publication year | Representative study population | Adequate follow-up period and attrition | Appropriate prognostic factor (FeNO) measurement | Appropriate outcome measurement | Adequate statistical analysis (including confounding factors) and reporting | Free of conflict of interests | Overall risk of bias at study level | Comments |
|--------------------------------|---------------------------------|-----------------------------------------|--------------------------------------------------|---------------------------------|-----------------------------------------------------------------------------|-------------------------------|-------------------------------------|----------|
|--------------------------------|---------------------------------|-----------------------------------------|--------------------------------------------------|---------------------------------|-----------------------------------------------------------------------------|-------------------------------|-------------------------------------|----------|

**Study question 1: Does increased FeNO predict a favourable response to ICS in steroid-naïve asthmatics?**

|               |     |     |     |     |     |     |      |                                                                                                                                                         |
|---------------|-----|-----|-----|-----|-----|-----|------|---------------------------------------------------------------------------------------------------------------------------------------------------------|
| Cowan 2010    | yes | yes | yes | yes | yes | yes | low  |                                                                                                                                                         |
| Szeffler 2002 | yes | no  | yes | yes | yes | yes | high | In analyses 21/30 (70 %) participants (below the pre-defined threshold 80 %).                                                                           |
| Szeffler 2005 | yes | no  | yes | yes | yes | yes | high | It remains unclear, how many participants were included in the analyses, but the missing data were at least 23 % (over the pre-defined threshold 20 %). |

**Study question 2: Does increased FeNO predict risk of exacerbation in asthmatic patients on regular stable ICS treatment?**

|              |     |     |     |   |   |     |         |                                                                                                                                                                                                                                                                                                           |
|--------------|-----|-----|-----|---|---|-----|---------|-----------------------------------------------------------------------------------------------------------------------------------------------------------------------------------------------------------------------------------------------------------------------------------------------------------|
| Gelb 2006    | yes | yes | yes | ? | ? | yes | unclear | No reporting of blinding of participants (assessment of asthma exacerbation might be based only on announcement of a participant). Analyses based on use of optimal cutoff value of FeNO derived from data, but the sample size was small for reliable analyses.                                          |
| Kupczyk 2014 | yes | yes | yes | ? | ? | yes | unclear | No reporting of blinding of outcome assessor (regarding FeNO value). It remains unclear what was the basis for the cutoff value of 45 ppb used in the analyses.                                                                                                                                           |
| Ozier 2011   | no  | no  | yes | ? | ? | yes | high    | 25 % of participants without ICS medication. Follow-up time too short (3 weeks). No reporting of blinding of participants (assessment of asthma control was made by phone). Analyses based on use of optimal cutoff value of FeNO derived from data, but the sample size was small for reliable analyses. |

**Study question 3: Does increased FeNO in asthmatic patients on regular stable ICS treatment predict further benefit from augmenting the glucocorticoid treatment?**

|                     |     |     |     |     |     |     |         |                                                                                                                                                                                                                        |
|---------------------|-----|-----|-----|-----|-----|-----|---------|------------------------------------------------------------------------------------------------------------------------------------------------------------------------------------------------------------------------|
| Kupczyk 2013        | yes | no  | yes | yes | ?   | yes | high    | Follow-up time too short (2 weeks). Analyses based on use of optimal cutoff value of FeNO derived from data.                                                                                                           |
| Little 2000         | yes | yes | yes | yes | yes | yes | low     |                                                                                                                                                                                                                        |
| Michils 2008        | yes | ?   | yes | ?   | ?   | yes | unclear | Follow-up time and number of participants at follow-up remain unclear. No reporting of blinding of participants (subjective outcome measure). Analyses based on use of optimal cutoff value of FeNO derived from data. |
| Perez-de-Llano 2010 | yes | yes | yes | ?   | ?   | yes | unclear | No reporting of blinding of participants (subjective outcome measure). Analyses based on use of optimal cutoff value of FeNO derived from data.                                                                        |

**Study questions 4: If an asthmatic patient on low dose ICS has good asthma control for at least 3 months, does low baseline FeNO predict successful withdrawal of ICS without asthma relapse?**

|                 |     |     |     |   |     |     |         |                                                                                                                               |
|-----------------|-----|-----|-----|---|-----|-----|---------|-------------------------------------------------------------------------------------------------------------------------------|
| Pijnenburg 2005 | yes | yes | yes | ? | yes | yes | unclear | No reporting of blinding of participants (assessment of asthma relapse might be based only on announcement of a participant). |
|-----------------|-----|-----|-----|---|-----|-----|---------|-------------------------------------------------------------------------------------------------------------------------------|

**Study questions 5: If an asthmatic patient on low dose ICS has good asthma control for at least 3 months and the ICS is withdrawn, does increased FeNO level during the follow-up predict asthma relapse?**

|                 |     |     |     |     |     |     |         |                                                                                                                                                                                                                      |
|-----------------|-----|-----|-----|-----|-----|-----|---------|----------------------------------------------------------------------------------------------------------------------------------------------------------------------------------------------------------------------|
| Ferrer 2010     | yes | yes | yes | yes | ?   | yes | unclear | The cutoff value of 49 ppb for allocating study groups was based on median value of data and on results reported in the study by Pijnenburg 2005. The value is unreliable because both studies were very small.      |
| Pijnenburg 2005 | ?   | yes | yes | ?   | yes | yes | unclear | It remains unclear, whether the difference between the study groups regarding ICS dosage influenced on change of NO value after discontinuing the medication or not. No reporting of blinding of study participants. |

? = unclear, not reported or reporting unclear
